# Supplementary material for: Accelerating hydrazine-assisted hydrogen production kinetics with Mn dopant modulated CoS2 nanowire arrays
Source: Royal Society of Chemistry journal article supplement (doi:10.1039/d2qi00083k), 2022-01-01
Supplement: d2qi00083k1.pdf [file d2qi00083k1.pdf]

## ***Supporting Information for***

### **Accelerating hydrazine-assisted hydrogen production kinetics with Mn dopant modulated CoS<sub>2</sub> nanowires array**

Junrong Hou<sup>a,b,†</sup>, Xianyun Peng<sup>c,d,†\*</sup>, Jiaqiang Sun<sup>e</sup>, Shusheng Zhang<sup>f</sup>, Qian Liu<sup>g</sup>, Xinzhong Wang<sup>a\*</sup>, Jun Luo<sup>h</sup>, and Xijun Liu<sup>b\*</sup>

<sup>a</sup> Information Technology Research Institute, Shenzhen Institute of Information Technology, Shenzhen 518172, China.

<sup>b</sup> MOE Key Laboratory of New Processing Technology for Non-Ferrous Metals and Materials, and Guangxi Key Laboratory of Processing for Non-Ferrous Metals and Featured Materials, School of Resource, Environments, and Materials, Guangxi University, Nanning 530004, China.

<sup>c</sup> Institute of Zhejiang University–Quzhou, Quzhou 324000, China.

<sup>d</sup> Key Laboratory of Biomass Chemical Engineering of Ministry of Education, College of Chemical and Biological Engineering, Zhejiang University, Hangzhou 310027, China.

<sup>e</sup> State Key Laboratory of Coal Conversion, Institute of Coal Chemistry, Chinese Academy of Sciences, Taiyuan 030001, China.

<sup>f</sup> College of Chemistry, Zhengzhou University, Zhengzhou 450000, China.

<sup>g</sup> Institute for Advanced Study, Chengdu University, Chengdu 610106, Sichuan, China.

<sup>h</sup> Institute for New Energy Materials & Low-Carbon Technologies and Tianjin Key Lab of

Photoelectric Materials & Devices, School of Materials Science and Engineering, Tianjin  
University of Technology, Tianjin 300384, China.

† The authors contributed equally to this work.

\* Corresponding author (email: xianyunpeng@zju.edu.cn; wangxz@szit.com.cn;  
xjliu@tjut.edu.cn)

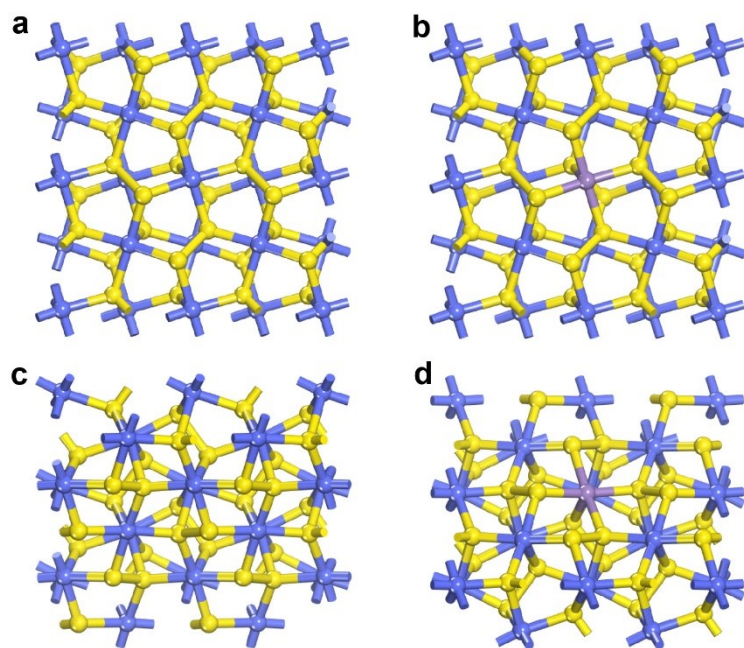

**Figure S1.** The different views of the optimized structural model for (a, c) CoS<sub>2</sub>(001) and (b, d) Mn-CoS<sub>2</sub>(001).

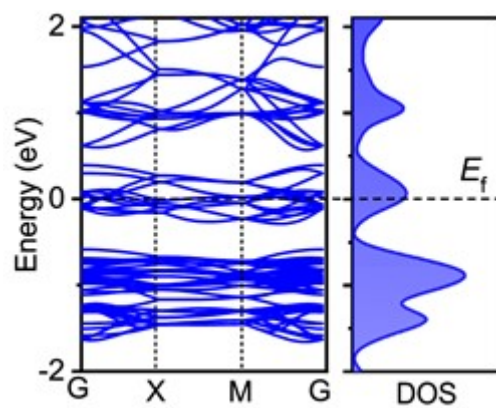

**Figure S2.** The calculated electronic band structure and the corresponding DOS results of the CoS<sub>2</sub>.

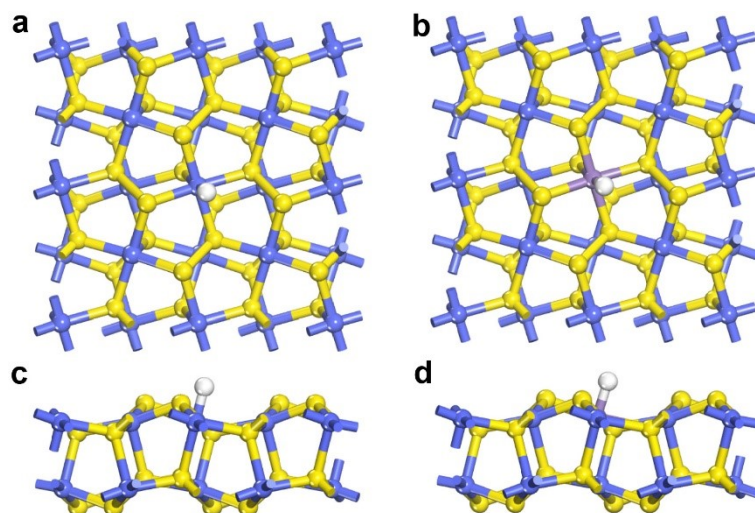

**Figure S3.** The different views of the optimized structural model of the adsorption of hydrogen over the surface (a, c) CoS<sub>2</sub>(001) and (b, d) Mn-CoS<sub>2</sub>(001).

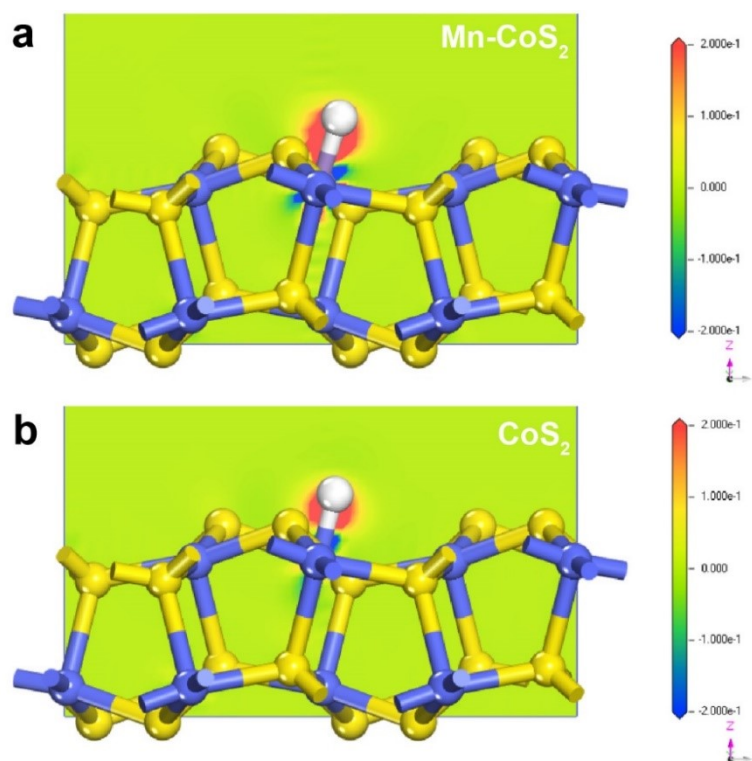

**Figure S4.** The charge density difference contour plot in the Co-H and Mn-H region, the red and blue colors represent the accumulation and depletion of electrons, respectively.

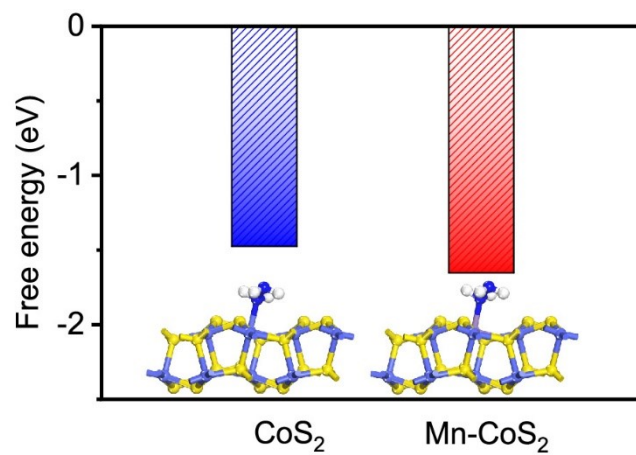

**Figure S5.** The adsorption energy for the N<sub>2</sub>H<sub>4</sub> molecule over the surface of the catalyst. The inset is the corresponding structural optimization model.

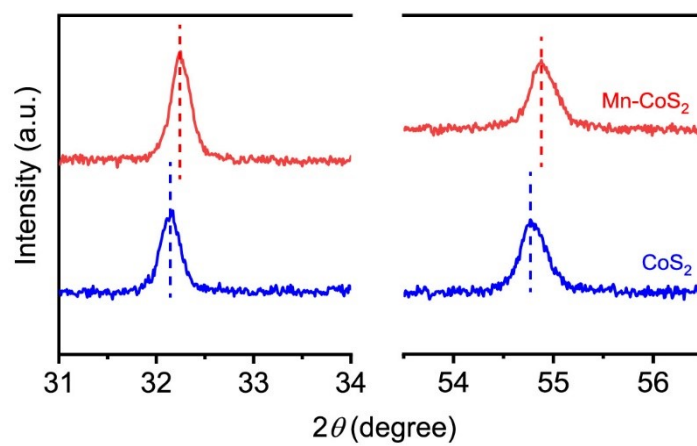

**Figure S6.** The XRD enlarged pattern corresponds to Figure 3a.



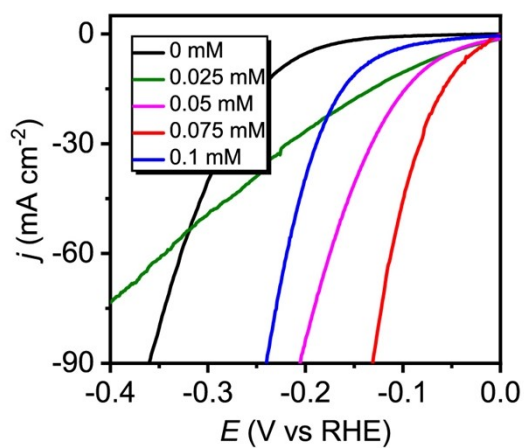

**Figure S7.** HER polarization curves of the Mn-CoS<sub>2</sub> catalyst with different addition content of Mn precursor (MnCl<sub>2</sub>·4H<sub>2</sub>O) in 0.1 M KOH aqueous solution.

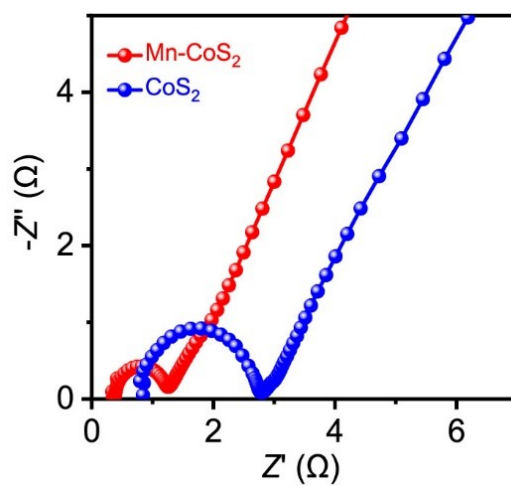

**Figure S8.** Nyquist plots of the CoS<sub>2</sub> and Mn-CoS<sub>2</sub>. Obviously, the Mn-CoS<sub>2</sub> electrode exhibits an enhanced electron transfer rate and faster catalytic kinetics during the electrochemical process.

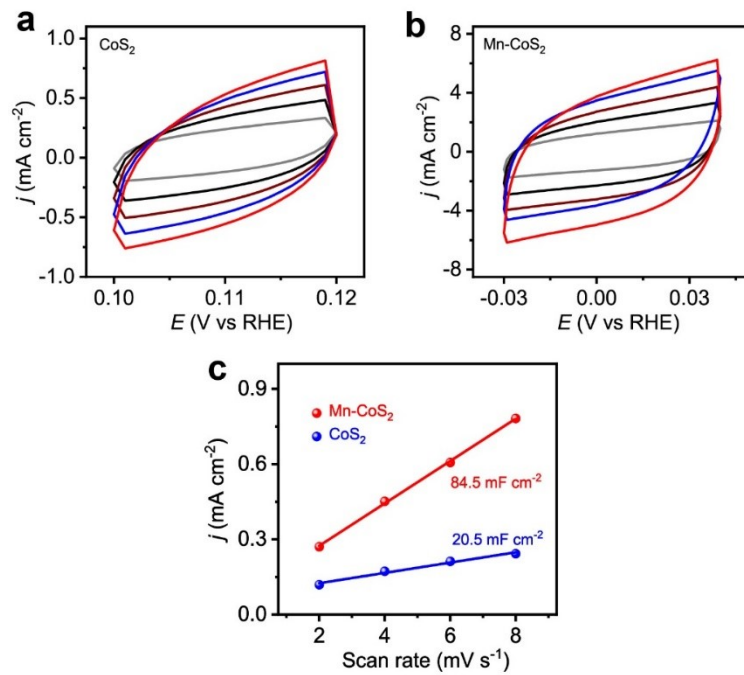

**Figure S9.** The CV curves (a) CoS<sub>2</sub> and (b) Mn-CoS<sub>2</sub> with different scan rates of 2, 4, 6, and 8 mV s<sup>-1</sup>. (b)

The capacitive current densities as a function of scan rate for the catalysts.

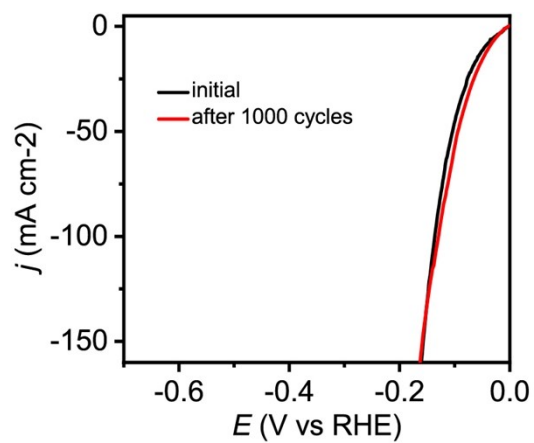

**Figure S10.** HER polarization curves of the Mn-CoS<sub>2</sub> catalyst before and after 1000 CV cycles.

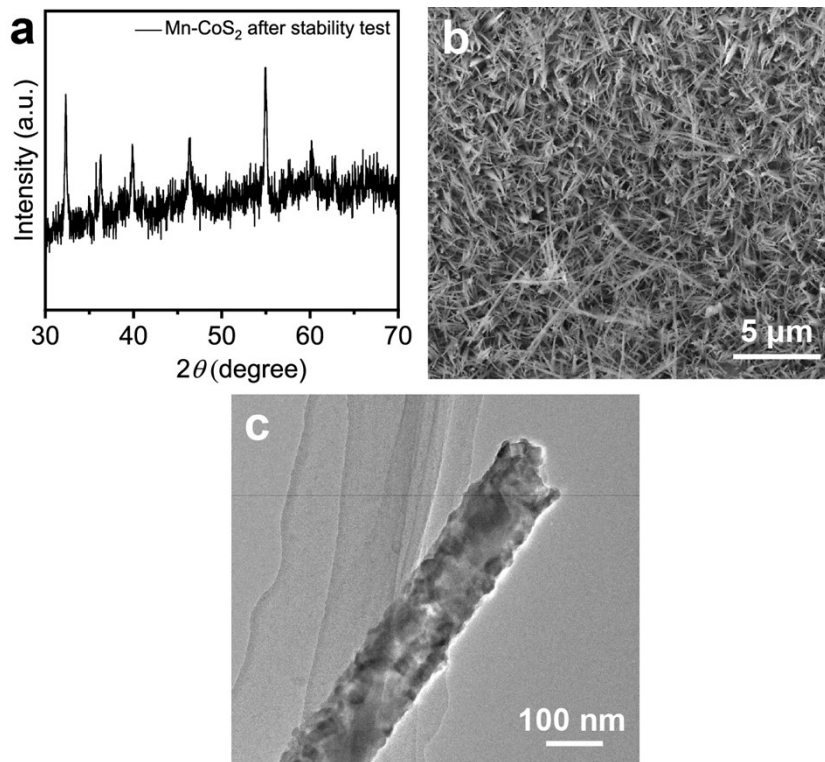

**Figure S11.** XRD pattern, SEM, and TEM images of the Mn-CoS<sub>2</sub> catalyst after the 54-h HER cycling stability measurement.

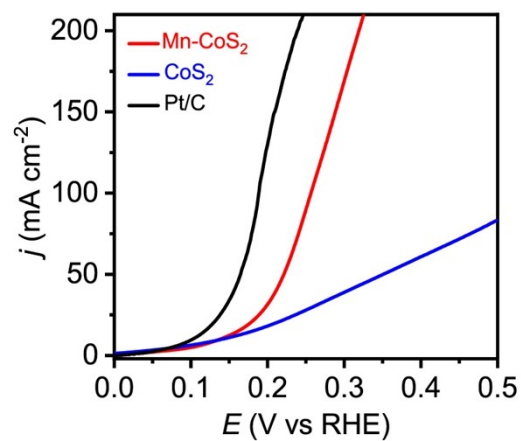

**Figure S12.** HzOR polarization curves of the Mn-CoS<sub>2</sub> in comparison with CoS<sub>2</sub> and commercial Pt/C (20 wt%) in 1 M H<sub>2</sub>SO<sub>4</sub> + 0.5 M N<sub>2</sub>H<sub>4</sub> aqueous solutions.

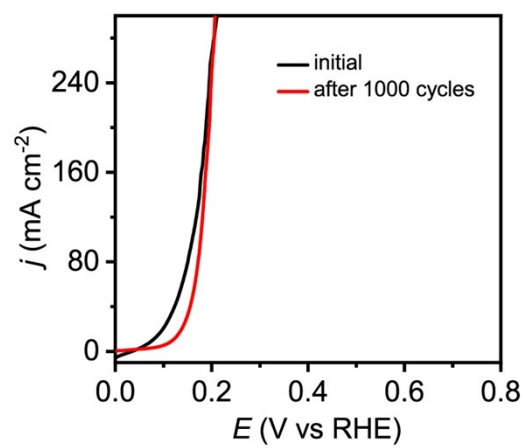

**Figure S13.** HzOR polarization curves of the Mn-CoS<sub>2</sub> catalyst before and after 1000 CV cycles.

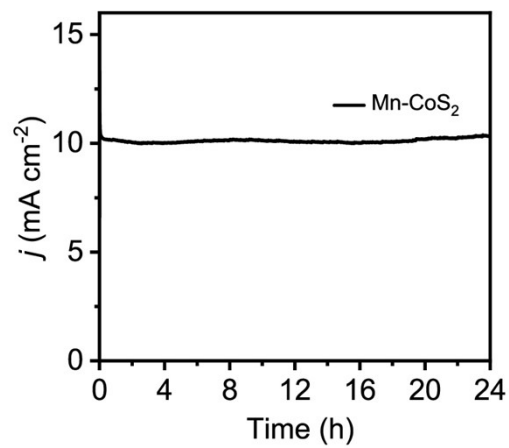

**Figure S14.** The  $i$ - $t$  curve of the Mn-CoS<sub>2</sub> electrode in the OHzS system for 24 h.



**Table S1. Comparison of HER performances in alkaline media for Mn-CoS<sub>2</sub> with previously reported HER electrocatalysts.**

| <i>Catalysts</i>                | <i>Electrolyte</i> | <i><math>\eta_{-10}</math> (mV)</i> | <i>Tafel slope (mV dec<sup>-1</sup>)</i> | <i>Mass loading (mg cm<sup>-2</sup>)</i> | <i>substrate</i>        | <i>Ref.</i>                                |
|---------------------------------|--------------------|-------------------------------------|------------------------------------------|------------------------------------------|-------------------------|--------------------------------------------|
| Mn-CoS <sub>2</sub>             | 0.1 KOH            | 46                                  | 63.1                                     | 2.9                                      | Ni foam                 | <i>This work</i>                           |
| RhIr MNs                        | 1 M KOH            | 20                                  | 30.7                                     | 0.14                                     | glassy carbon electrode | <i>J. Mater. Chem. A 2021, 9, 18323</i>    |
| P-NiFeP/Ni                      | 1 M KOH            | 17.9                                | 63                                       | -                                        | Ni foam                 | <i>Nanoscale Adv. 2021, 3, 2280</i>        |
| NiCo-MoNi <sub>4</sub> HMNAs/NF | 1 M KOH            | 68                                  | 67.5                                     | -                                        | Ni foam                 | <i>Chem. Eng. J. 2021, 414, 128818</i>     |
| P-CoCO <sub>3</sub> /CF         | 1 M KOH            | 46.1                                | 71.16                                    | -                                        | Co foam                 | <i>Sustain. Energy Fuels 2021, 5, 2257</i> |
| Ni(Cu) CNPs                     | 1 M KOH            | 41                                  | 51.1                                     | -                                        | Ni foam                 | <i>J. Mater. Chem. A 2020, 8, 21084</i>    |
| CoP/Ni <sub>2</sub> P@NC        | 1 M KOH            | 143                                 | 76                                       | -                                        | glassy carbon electrode | <i>Mater. Chem. Front. 2019, 3, 2428</i>   |
| CoP/TF                          | 1 M KOH            | 118                                 | 62                                       | -                                        | Ti foil                 | <i>Adv. Energy Mater. 2019, 9, 1803970</i> |
| Ni <sub>2</sub> P-CoP HNSAs/CC  | 1 M KOH            | 73(30 mA cm <sup>-2</sup> )         | 120                                      | -                                        | carbon cloth            | <i>J. Mater. Chem. A 2016, 4, 16992</i>    |

|                                              |                                      |       |       |       |                         |                                                |
|----------------------------------------------|--------------------------------------|-------|-------|-------|-------------------------|------------------------------------------------|
| Ni <sub>2</sub> P NSs/CC                     |                                      | > 200 | 142   | -     |                         |                                                |
| CoP NSs/CC                                   |                                      | > 200 | 177   | -     |                         |                                                |
| Ni <sub>2</sub> P/Co <sub>2</sub> P@NC       | 1 M KOH                              | 251   | 81.64 | 0.199 | glassy carbon electrode | <i>Int. J. Hydrogen Energy</i> 2019, 44, 14908 |
|                                              | 0.5 M H <sub>2</sub> SO <sub>4</sub> | 226   | 64.9  |       |                         |                                                |
| Ni <sub>2</sub> P@C                          | 0.5 M H <sub>2</sub> SO <sub>4</sub> | 186   | 64    | 0.566 | glassy carbon electrode | <i>Appl. Surf. Sci.</i> 2018, 457, 933         |
| CoP@NPMG                                     | 1 M KOH                              | 151   | 75    | 0.204 | glassy carbon electrode | <i>Nanoscale</i> 2018, 10, 2603                |
| CoP/NiCoP                                    | 1 M KOH                              | 133   | 88    | 2     | Ti foil                 | <i>Adv. Energy Mater.</i> 2019, 9, 1901213     |
| Zn <sub>0.64</sub> -CoP/Co <sub>2</sub> P@CC | 1 M KOH                              | 95    | 82    | 5.74  | carbon cloth            | <i>J. Solid State Chem.</i> 2020, 285, 121231  |
| Co <sub>2</sub> P/CNT-900                    | 1 M KOH                              | 132   | 103   | ~0.75 | glassy carbon electrode | <i>Nano Energy</i> 2016, 30, 303               |
| SF-Co <sub>x</sub> P                         | 1 M KOH                              | 167   | 75    | 0.5   | glassy carbon electrode | <i>Small</i> 2018, 14, 1801284                 |
| CF-Co <sub>x</sub> P                         |                                      | 148   | 73    |       |                         |                                                |
| C-Co <sub>x</sub> P                          |                                      | 121   | 62    |       |                         |                                                |

|                                              |         |     |      |       |                         |                                               |
|----------------------------------------------|---------|-----|------|-------|-------------------------|-----------------------------------------------|
| <b>Ni<sub>2</sub>P/NF</b>                    | 1 M KOH | 116 | 68   | -     | Ni foam                 | <i>Nano Res. 2020, 13, 2098</i>               |
| <b>Ni<sub>2</sub>P/Ni/NF</b>                 | 1 M KOH | 98  | -    | -     | Ni foam                 | <i>ACS Catal. 2016, 6, 2, 714</i>             |
| <b>NiFeLDH<br/>NiCoP/NF</b>                  | 1 M KOH | 120 | 48.6 | 2     | Ni foam                 | <i>Adv. Funct. Mater. 2018, 28, 1706847</i>   |
| <b>Ni<sub>2</sub>P</b>                       | 1 M KOH | 148 | 61   | -     | Ni foam                 | <i>Int. J. Hydrogen Energy 2020, 45, 2546</i> |
| <b>Ni<sub>5</sub>P<sub>4</sub></b>           | 1 M KOH | 150 | 53   | 3.475 | Ni foil                 | <i>Angew. Chem. Int. Ed. 2015, 54, 12361</i>  |
| <b>Ni<sub>2</sub>P-NiSe<sub>2</sub>/CC</b>   | 1 M KOH | 66  | 72.6 | 9.2   | carbon cloth            | <i>Appl. Catal. B 2020, 262, 118245</i>       |
| <b>V-Ni<sub>2</sub>P NSAs/CC</b>             | 1 M KOH | 85  | 95   | -     | carbon cloth            | <i>Nanoscale 2019, 11, 4198</i>               |
| <b>Ni<sub>2</sub>P@NPCNFs</b>                | 1 M KOH | 104 | 79.7 | -     | carbon cloth            | <i>Angew. Chem. Int. Ed. 2018, 57, 1963</i>   |
| <b>Co-P/NC</b>                               | 1 M KOH | 154 | 51   | 0.283 | glassy carbon electrode | <i>Chem. Mater. 2015, 27, 7636</i>            |
| <b>Ni(OH)<sub>2</sub>/NiSe<sub>2</sub>/C</b> | 1 M KOH | 82  | 60   | 3.45  | carbon cloth            | <i>Int. J. Hydrogen Energy 2019, 44, 4832</i> |
| <b>CoP/rGO</b>                               | 1 M KOH | 150 | 38   | 0.28  | glassy carbon electrode | <i>Chem. Sci. 2016, 7, 1690</i>               |

|                                         |         |     |     |      |                    |                                                  |
|-----------------------------------------|---------|-----|-----|------|--------------------|--------------------------------------------------|
| <b>p-CoSe<sub>2</sub>/CC</b>            | 1 M KOH | 138 | 83  | 2.3  | carbon cloth       | <i>ACS Sustainable Chem. Eng.</i> 2018, 6, 15374 |
| <b>NiSe-Ni<sub>0.85</sub>Se/CP</b>      | 1 M KOH | 101 | 102 | 1.68 | carbon fiber paper | <i>Small</i> 2018, 14, 1800763                   |
| <b>Ni<sub>3</sub>S<sub>2</sub>/NF</b>   | 1 M KOH | 131 | 96  | 1.4  | Ni foam            | <i>Nanoscale</i> 2018, 10, 17347                 |
| <b>NiCo<sub>2</sub>O<sub>4</sub>/NF</b> | 1 M KOH | 164 | 88  | -    | Ni foam            | <i>Adv. Funct. Mater.</i> 2016, 26, 3515         |

**Table S2. Comparison of HzOR performances for Mn-CoS<sub>2</sub> with previously reported HzOR electrocatalysts.**

| <i>Catalysts</i>                          | <i>Electrolyte</i>                                    | <i>Potential (mV vs RHE)</i>                          | <i>Mass loading (mg cm<sup>-2</sup>)</i> | <i>substrate</i>        | <i>Ref.</i>                                        |
|-------------------------------------------|-------------------------------------------------------|-------------------------------------------------------|------------------------------------------|-------------------------|----------------------------------------------------|
| <b>Mn-CoS<sub>2</sub></b>                 | 0.5 M N <sub>2</sub> H <sub>4</sub> + 1 M KOH         | $E_{10} = 77$                                         | 2.9                                      | Ni foam                 | <i>This work</i>                                   |
| <b>3D NiCoSe<sub>2</sub>/NF</b>           | 0.1 M N <sub>2</sub> H <sub>4</sub> + 0.5 M KOH       | $E_{\text{onset}} = -0.7 \text{ V vs SCE}$            | -                                        | Ni foam                 | <i>ACS Sustainable Chem. Eng. 2018, 6, 7735</i>    |
| <b>NSC</b>                                | 0.05 M N <sub>2</sub> H <sub>4</sub> + 0.1 M PBS      | $E_{\text{onset}} = 380$                              | -                                        | glassy carbon electrode | <i>Appl. Catal. B: Environ. 2018, 225, 30</i>      |
| <b>Co/LaCoOx@N-C-1</b>                    | 0.1 M N <sub>2</sub> H <sub>4</sub> + 1 M KOH         | $E_{\text{onset}} = -170$                             | 0.285                                    | glassy carbon electrode | <i>ACS Appl. Mater. Interfaces 2020, 12, 24701</i> |
| <b>Co<sub>3</sub>O<sub>4</sub>/Co</b>     | 0.3 M N <sub>2</sub> H <sub>4</sub> + 1 M KOH         | $E_{50} = -110$<br>$E_{200} = -32$<br>$E_{300} = -14$ | 6.5                                      | glassy carbon electrode | <i>ACS Sustainable Chem. Eng. 2020, 8, 7973</i>    |
| <b>FeWO<sub>4</sub>-WO<sub>3</sub>/NF</b> | 0.5 M N <sub>2</sub> H <sub>4</sub> + 1 M KOH         | $E_{10} = -34$<br>$E_{1000} = 164$                    | -                                        | Ni foam                 | <i>Nano Res. 2021, 14, 4356</i>                    |
| <b>MWCNT-NH<sub>2</sub>@PQQ</b>           | 0.01 M N <sub>2</sub> H <sub>4</sub> + 0.1 M Tris-HCl | $E_{0.154} = 0.36 \text{ V vs Ag/AgCl}$               | -                                        | glassy carbon electrode | <i>ACS Appl. Nano Mater. 2018, 1, 2069</i>         |
| <b>FeN<sub>4</sub>/HPCM</b>               | 0.1 M N <sub>2</sub> H <sub>4</sub> + 1 M KOH         | $E_{\text{onset}} = 200$                              | 0.6                                      | filter paper            | <i>Small 2020, 16, 2002203</i>                     |
| <b>NC@Co/NC</b>                           | 0.01 M N <sub>2</sub> H <sub>4</sub> + 1 M KOH        | $E_{\text{onset}} = 470$                              | 0.25                                     | glassy carbon electrode | <i>ACS Nano 2021, 15, 10286</i>                    |

|                                                  |                                                |                                               |       |                         |                                                   |
|--------------------------------------------------|------------------------------------------------|-----------------------------------------------|-------|-------------------------|---------------------------------------------------|
|                                                  | 0.05 M N <sub>2</sub> H <sub>4</sub> + 1 M KOH | $E_{\text{onset}} = 410$                      |       |                         |                                                   |
|                                                  | 0.1 M N <sub>2</sub> H <sub>4</sub> + 1 M KOH  | $E_{\text{onset}} = 370$                      |       |                         |                                                   |
| <b><math>\beta</math>-Ni(OH)<sub>2</sub>/SSM</b> | 0.5 M N <sub>2</sub> H <sub>4</sub> + 1 M KOH  | $E_{50} = 1340$                               | 0.8   | Stainless steel mesh    | <i>ChemCatChem</i> 2021, 13, 1165                 |
| <b>RhIr MNs</b>                                  | 0.5 M N <sub>2</sub> H <sub>4</sub> + 1 M KOH  | $E_{10} = -12$<br>$E_{100} = 117$             | 0.14  | glassy carbon electrode | <i>J. Mater. Chem. A</i> 2021, 9, 18323           |
| <b>Pt/C</b>                                      |                                                | $E_{10} = 123$<br>$E_{100} = 300$             |       |                         |                                                   |
| <b>CoP/Co-20</b>                                 | 0.5 M N <sub>2</sub> H <sub>4</sub> + 1 M KOH  | $E_{10} = -69$<br>$E_{100} = 177$             | 0.275 | glassy carbon electrode | <i>J. Phys. Chem. Lett.</i> 2021, 12, 4849        |
| <b>P-NiFeP/Ni</b>                                | 0.1 M N <sub>2</sub> H <sub>4</sub> + 1 M KOH  | $E_{10} = 77$                                 | -     | Ni foam                 | <i>Nanoscale Adv.</i> 2021, 3, 2280               |
| <b>NiCo-MoNi<sub>4</sub> HMNAs/NF</b>            | 0.1 M N <sub>2</sub> H <sub>4</sub> + 1 M KOH  | $E_{10} = -30$                                | -     | Ni foam                 | <i>Chem. Eng. J.</i> 2021, 414, 128818            |
| <b>NiCoP/NF</b>                                  | 0.5 M N <sub>2</sub> H <sub>4</sub> + 1 M NaOH | $E_{1511} = 300$                              | -     | Ni foam                 | <i>Electrochim. Acta</i> 2021, 387, 138492        |
| <b>Ni-Co/NF</b>                                  | 0.5 M N <sub>2</sub> H <sub>4</sub> + 1 M NaOH | $E_{\text{onset}} = -160$<br>$E_{1213} = 300$ | -     | Ni foam                 | <i>ACS Sustainable Chem. Eng.</i> 2020, 8, 16583  |
| <b>A-Ru-KB</b>                                   | 0.1 M N <sub>2</sub> H <sub>4</sub> + 1 M KOH  | $E_{\text{onset}} = -83$                      | 3     | glassy carbon electrode | <i>ACS Appl. Mater. Interfaces</i> 2021, 13, 8488 |
| <b>Pt/C</b>                                      |                                                | $E_{\text{onset}} = 61$                       |       |                         |                                                   |

|                                  |                                                  |                                              |     |                         |                                                 |
|----------------------------------|--------------------------------------------------|----------------------------------------------|-----|-------------------------|-------------------------------------------------|
| <b>Ni@Pd-Ni</b>                  | 0.02 M N <sub>2</sub> H <sub>4</sub> + 1 M KOH   | $E_{\text{onset}} = -990$ vs Ag/AgCl         | -   | Ni nanowire arrays      | <i>ChemElectroChem</i> , 2019, 6, 5581          |
| <b>MoC<sub>x</sub>-NC-900</b>    | 0.02 M N <sub>2</sub> H <sub>4</sub> + 0.1 M KOH | $E_{\text{onset}} = 650$                     | 1   | glassy carbon electrode | <i>Electrochim. Acta</i> 2021, 384, 138417      |
| <b>Cas-Cu-R</b>                  | 0.05 M N <sub>2</sub> H <sub>4</sub> + 0.1 M PBS | $E_{\text{onset}} = 350$                     | 0.1 | glassy carbon electrode | <i>J. Electroanal. Chem.</i> 2021, 882, 114997  |
| <b>PNC<sub>3</sub></b>           | 0.1 M N <sub>2</sub> H <sub>4</sub> + 0.01 M PBS | $E_{\text{onset}} = 420$                     | -   | glassy carbon electrode | <i>ACS Appl. Energy Mater.</i> 2019, 2, 2313    |
| <b>Ni<sub>0.85</sub>Se/rGO</b>   | 0.1 M N <sub>2</sub> H <sub>4</sub> + 1 M KOH    | $E_{\text{onset}} = 40$                      | -   | Ni foam                 | <i>J. Electrochem. Soc.</i> 2021 168 104510     |
| <b>P-CoCO<sub>3</sub>/CF</b>     | 0.3 M N <sub>2</sub> H <sub>4</sub> + 1 M KOH    | $E_{100} = -42.3$                            | -   | Co foam                 | <i>Sustain. Energy Fuels</i> , 2021, 5, 2257    |
| <b>Ni(Cu) CNPs</b>               | 0.5 M N <sub>2</sub> H <sub>4</sub> + 1 M KOH    | $E_{10} = -18$                               | -   | Ni foam                 | <i>J. Mater. Chem. A</i> 2020, 8, 21084         |
| <b>CoP/TiM</b>                   | 0.1 M N <sub>2</sub> H <sub>4</sub> + 1 M KOH    | $E_{100} = -6$                               | 0.7 | Ti mesh                 | <i>ChemElectroChem</i> 2017, 4, 481             |
| <b>S-LDH-3</b>                   | 0.02 M N <sub>2</sub> H <sub>4</sub> + 0.1 M KOH | $E_{\text{onset}} = 210$                     | -   | Ni foam                 | <i>J. Mater. Chem. A</i> 2019, 7, 24437         |
| <b>NiS<sub>2</sub>/TiM</b>       | 0.5 M N <sub>2</sub> H <sub>4</sub> + 1 M KOH    | $E_{300} = 218$                              | 1.2 | Ti mesh                 | <i>Mater. Today Energy</i> 2017, 3, 9           |
| <b>Ni@Ni<sub>2</sub>P NTA/NF</b> | 0.5 M N <sub>2</sub> H <sub>4</sub> + 1 M KOH    | $E_{\text{onset}} = -90$<br>$E_{1120} = 300$ | -   | Ni foam                 | <i>ACS Sustainable Chem. Eng.</i> 2021, 9, 4564 |

**Table S3. Comparison of OH<sub>2</sub>S performances in alkaline media for Mn-CoS<sub>2</sub> with previously reported OH<sub>2</sub>S electrocatalysts.**

| <i>Catalysts</i>                                          | <i>Electrolyte</i>                            | <i>Potential</i><br>(mV vs RHE) | <i>Mass loading</i><br>(mg cm <sup>-2</sup> ) | <i>substrate</i>        | <i>Ref.</i>                                       |
|-----------------------------------------------------------|-----------------------------------------------|---------------------------------|-----------------------------------------------|-------------------------|---------------------------------------------------|
| <b>Mn-CoS<sub>2</sub></b>                                 | 0.5 M N <sub>2</sub> H <sub>4</sub> + 1 M KOH | $E_{200} = 447$                 | 2.9                                           | Ni foam                 | <i>This work</i>                                  |
| <b>Ni NCNA</b>                                            | 0.3 M N <sub>2</sub> H <sub>4</sub> + 1 M KOH | $E_{10} = 23$                   | 2.8                                           | Ni foam                 | <i>Small 2021, 17, 2008148</i>                    |
| <b>N-Ni<sub>1</sub>Co<sub>3</sub>Mn<sub>0.4</sub>O/NF</b> | 0.5 M N <sub>2</sub> H <sub>4</sub> + 1 M KOH | $E_{100} = 272$                 | 5.92                                          | Ni foam                 | <i>Int. J. Hydrog. Energy 2022, 47, 5766-5778</i> |
| <b>Ni<sub>3</sub>N-Co<sub>3</sub>N</b>                    | 0.1 M N <sub>2</sub> H <sub>4</sub> + 1 M KOH | $E_{10} = 71$                   | -                                             | Ni foam                 | <i>Angew. Chem. Int. Ed. 2021, 60, 5984</i>       |
| <b>CoP/Co</b>                                             | 0.5 M N <sub>2</sub> H <sub>4</sub> + 1 M KOH | $E_{10} = 260$                  | -                                             | glassy carbon electrode | <i>J. Phys. Chem. Lett. 2021, 12, 4849</i>        |
| <b>Mn-SA/BNC</b>                                          | 0.5 M N <sub>2</sub> H <sub>4</sub> + 1 M KOH | $E_{10} = 410$                  | 1                                             | glassy carbon electrode | <i>Nanoscale, 2021, 13, 4767</i>                  |
| <b>Rh-NS-HCS</b>                                          | 0.5 M N <sub>2</sub> H <sub>4</sub> + 1 M KOH | $E_{10} = 110$                  | 0.5                                           | carbon paper            | <i>Mater. Chem. Front., 2021, 5, 3125</i>         |
| <b>NiCo/MoNi<sub>4</sub></b>                              | 0.1 M N <sub>2</sub> H <sub>4</sub> + 1 M KOH | $E_{250} = 630$                 | -                                             | Ni foam                 | <i>Chem. Eng. J. 2021, 414, 128818</i>            |
